# Supplementary material for: Water conductance rather than photosynthesis controls water-use efficiency in Europe
Source: Research Square preprint supplement (doi:10.21203/rs.3.rs-1627127/v1), 2022-05-09
Supplement: Supplementary file 1 [file 0efebaab096e75e5e81e8a1a.pdf]

331

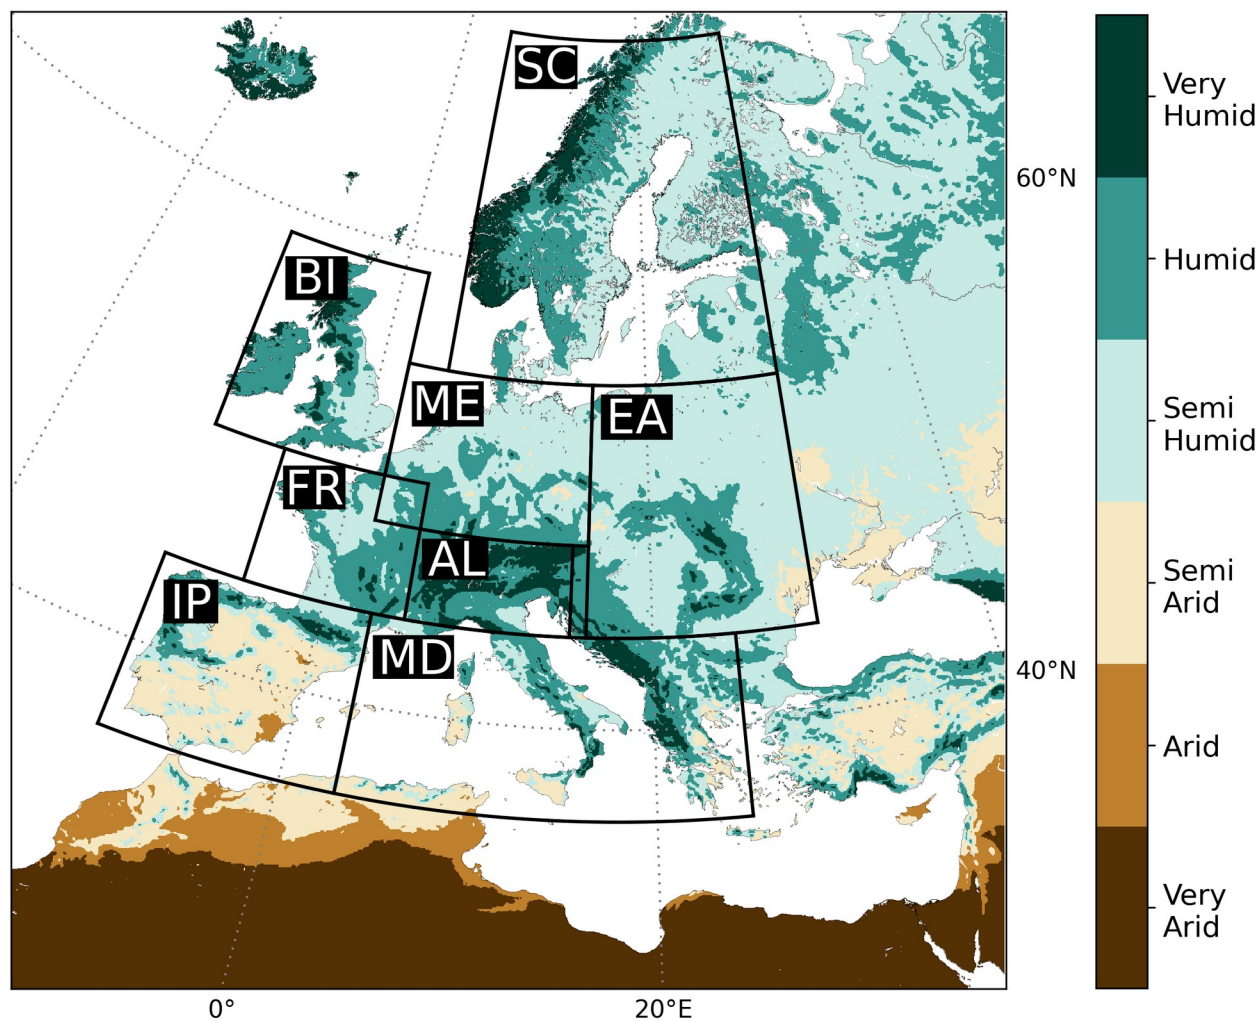

Fig. S5| Hydro climates (colormap, defined by annual precipitation thresholds, see Supplementary Table S1) and PRUDENCE<sup>58</sup> regions. IP: Iberian Peninsula, MD: Mediterranean, FR: France, AL: Alps, EA: Eastern Europe, BI: British Islands, ME: Mid / Central Europe, SC: Scandinavia.

332

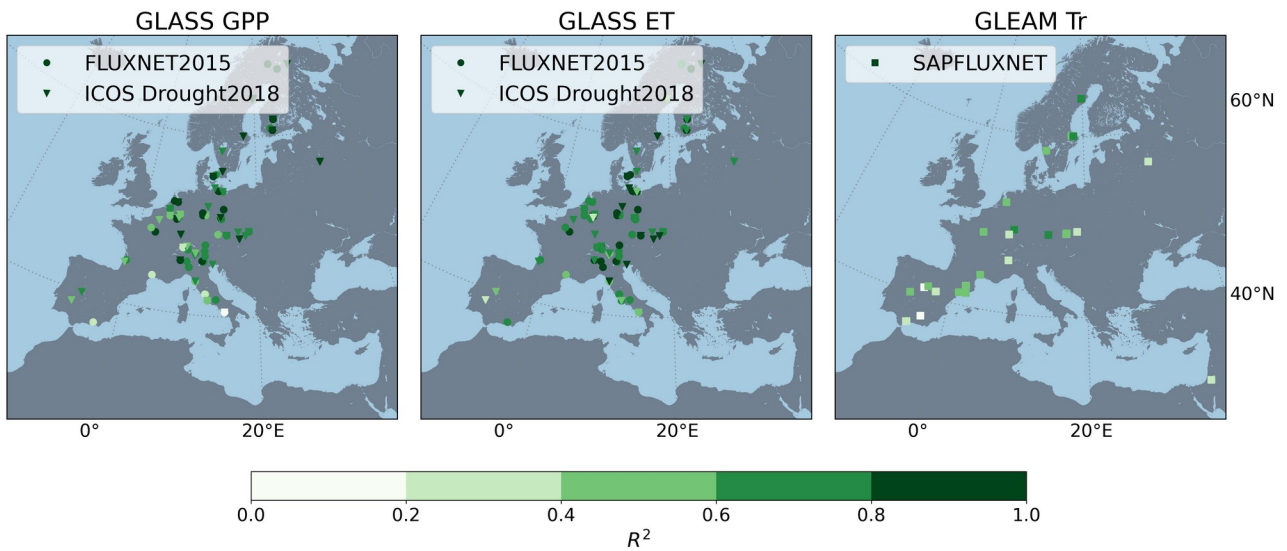

Fig. S6| Distribution of FLUXNET (circles), ICOS (triangles) and SAPFLUXNET (squares) stations. The color of the markers indicate the coefficient of determination  $R^2$  (colormap) for gross primary production (GPP)(a), evapotranspiration (ET)(b) and transpiration (Tr)(c).

333

334

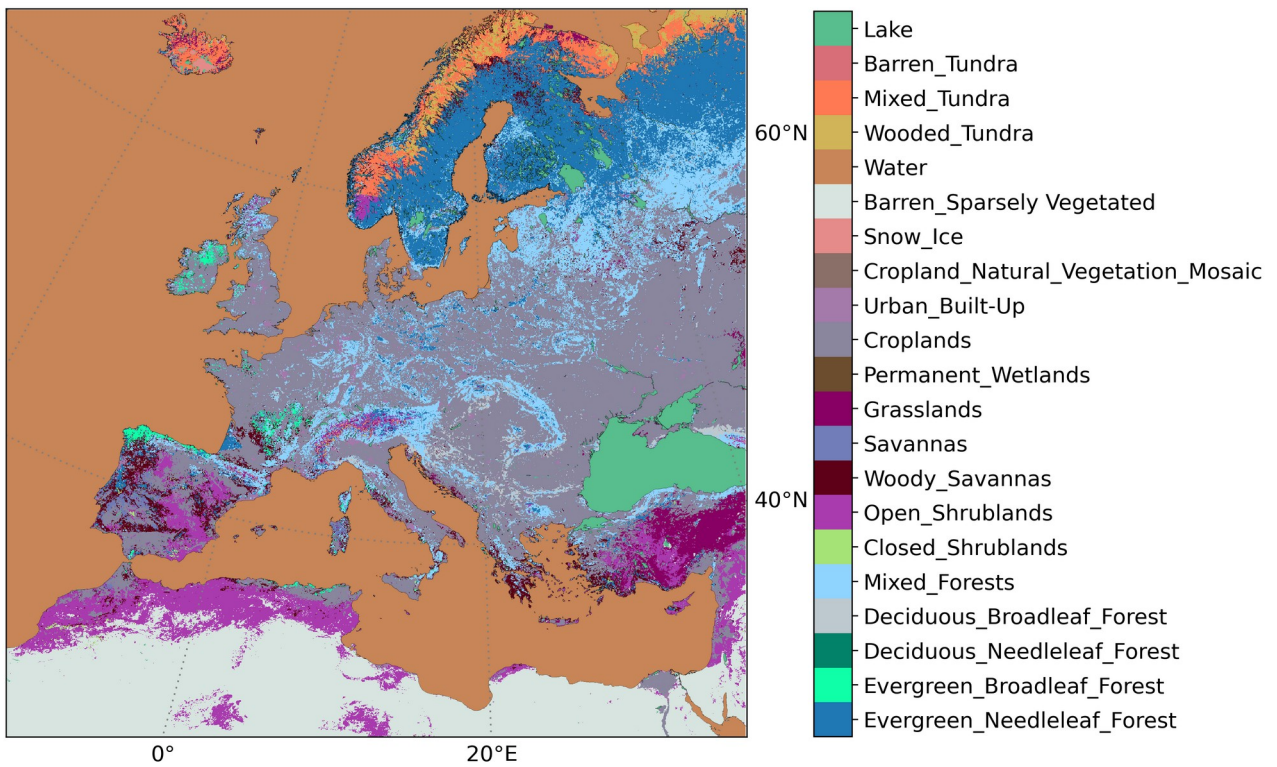

Fig. S7| Land cover over the study domain from IGBP-modified MODIS 20 land-use categories.

335

Table S1| Hydro-climates and defined annual precipitation ( $P_a$ ) thresholds. Adapted from Jafari et al. 2018<sup>46</sup>.

| <b>Hydro-climate</b> | <b>Annual precipitation (<math>P_a</math>) thresholds [mm]</b> |
|----------------------|----------------------------------------------------------------|
| Very humid           | $P_a \geq 1200$                                                |
| Humid                | $700 \leq P_a < 1200$                                          |
| Semi humid           | $500 \leq P_a < 700$                                           |
| Semi arid            | $250 \leq P_a < 500$                                           |
| Arid                 | $100 \leq P_a < 250$                                           |
| Very arid            | $P_a < 100$                                                    |

Table S2| Drought categories by thresholds of a drought index (SXI). These thresholds were applied to both SPI and SSI values to determine the severity of the drought as used in Fig. 3.

| <b>Drought Category</b> | <b>Drought Index (SXI) Threshold</b> |
|-------------------------|--------------------------------------|
| Extreme dry             | $SXI < -2$                           |
| Very dry                | $-2 \leq SXI < -1.5$                 |
| Moderate dry            | $-1.5 \leq SXI < -1$                 |
| Normal                  | $-1 \leq SXI < 1$                    |
| Moderate wet            | $1 \leq SXI < 2$                     |
| Very wet                | $1.5 \leq SXI < 2$                   |
| Extreme wet             | $SXI \geq 2$                         |

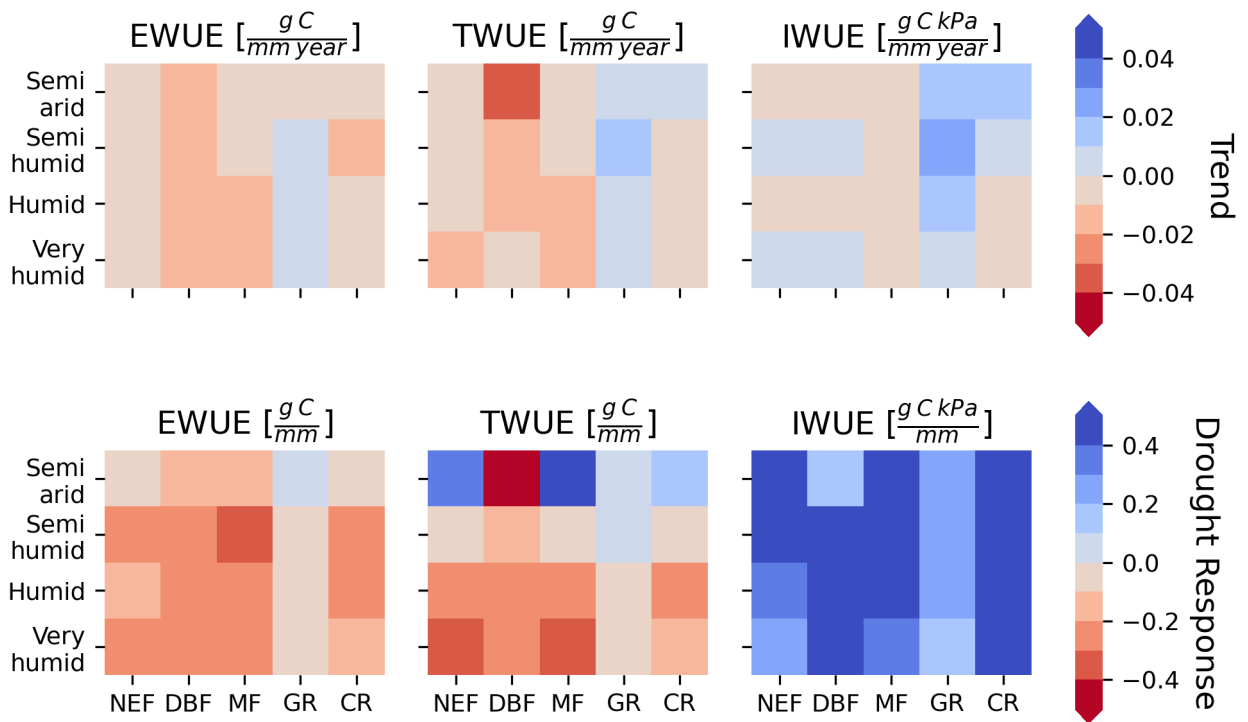

Fig. S8| The median trend (a, b, c) and median drought response (d, e, f) aggregated over grid cells along land cover (x-axes, NEF = Needleleaf Evergreen Forest, DBF = Deciduous Broadleaf Forest, MF = Mixed Forest, GR = Grasslands, C = Croplands) and hydro-climates (y-axes).

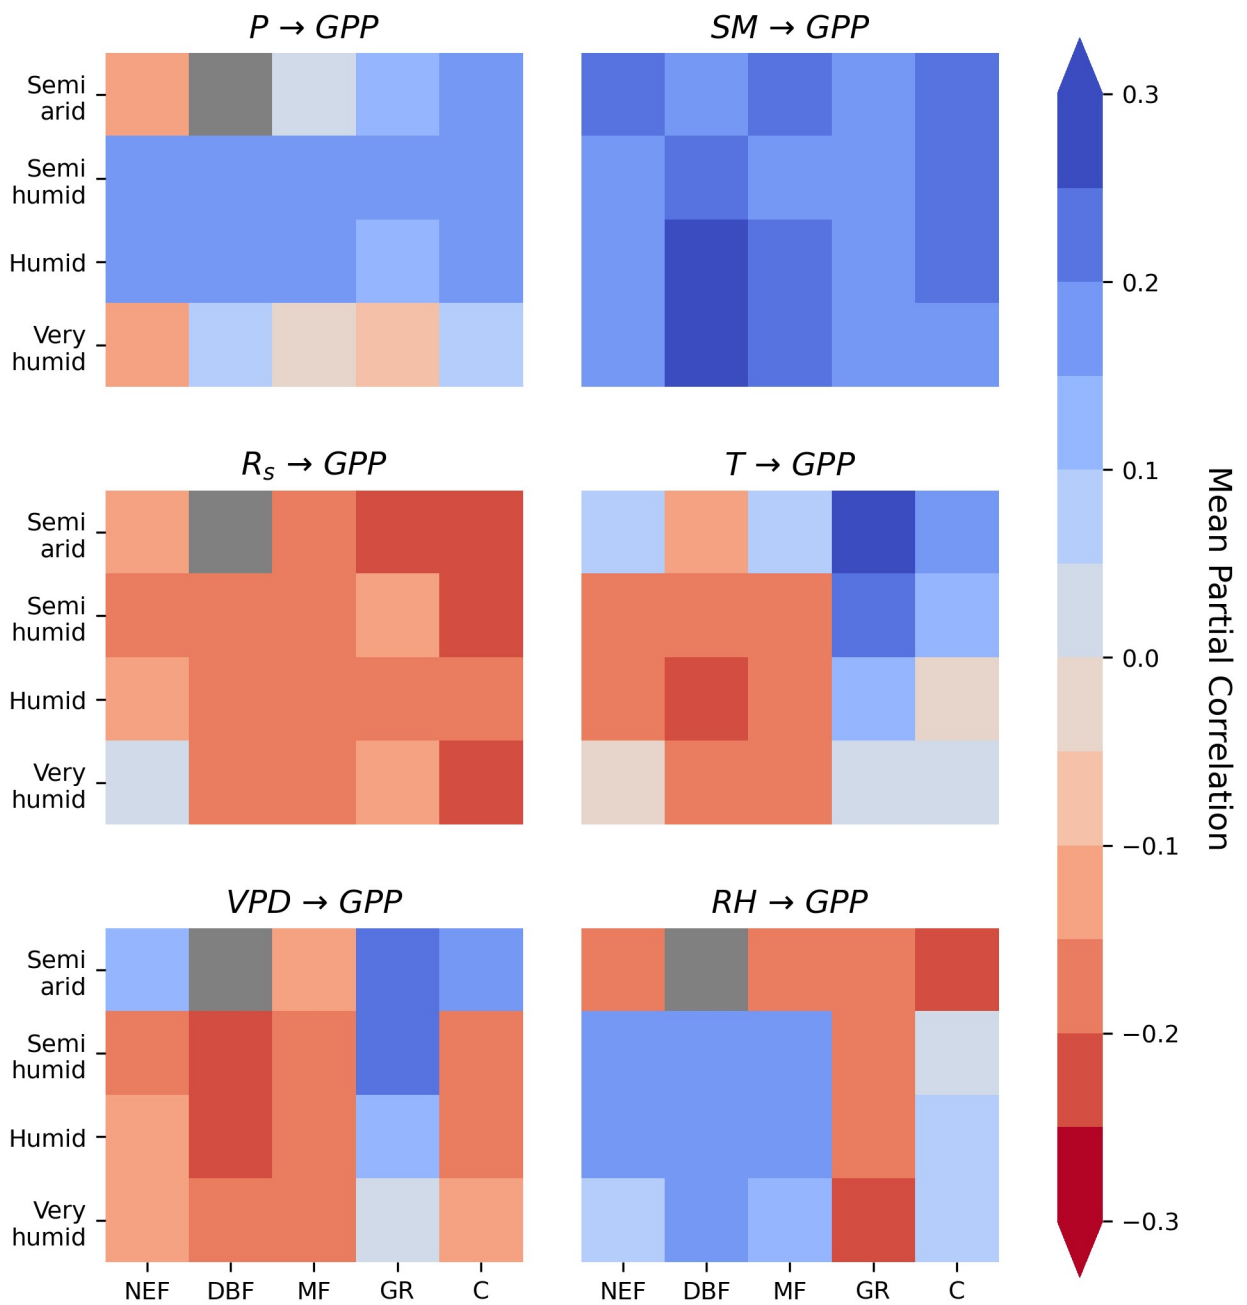

Fig. S9| Mean partial correlations (colormap) at detected directed links from the PCMCi+ analysis between hydrological (precipitation (P), soil moisture (SM)) and meteorological (shortwave incoming radiation ( $R_s$ ), temperature (T), vapour pressure deficit (VPD), relative humidity (RH)) variables to Gross Primary Production (GPP) aggregated over land cover (x-axes, NEF = Needleleaf Evergreen Forest, DBF = Deciduous Broadleaf Forest, MF = Mixed Forest, GR = Grasslands, C = Croplands) and hydro-climates (y-axes).

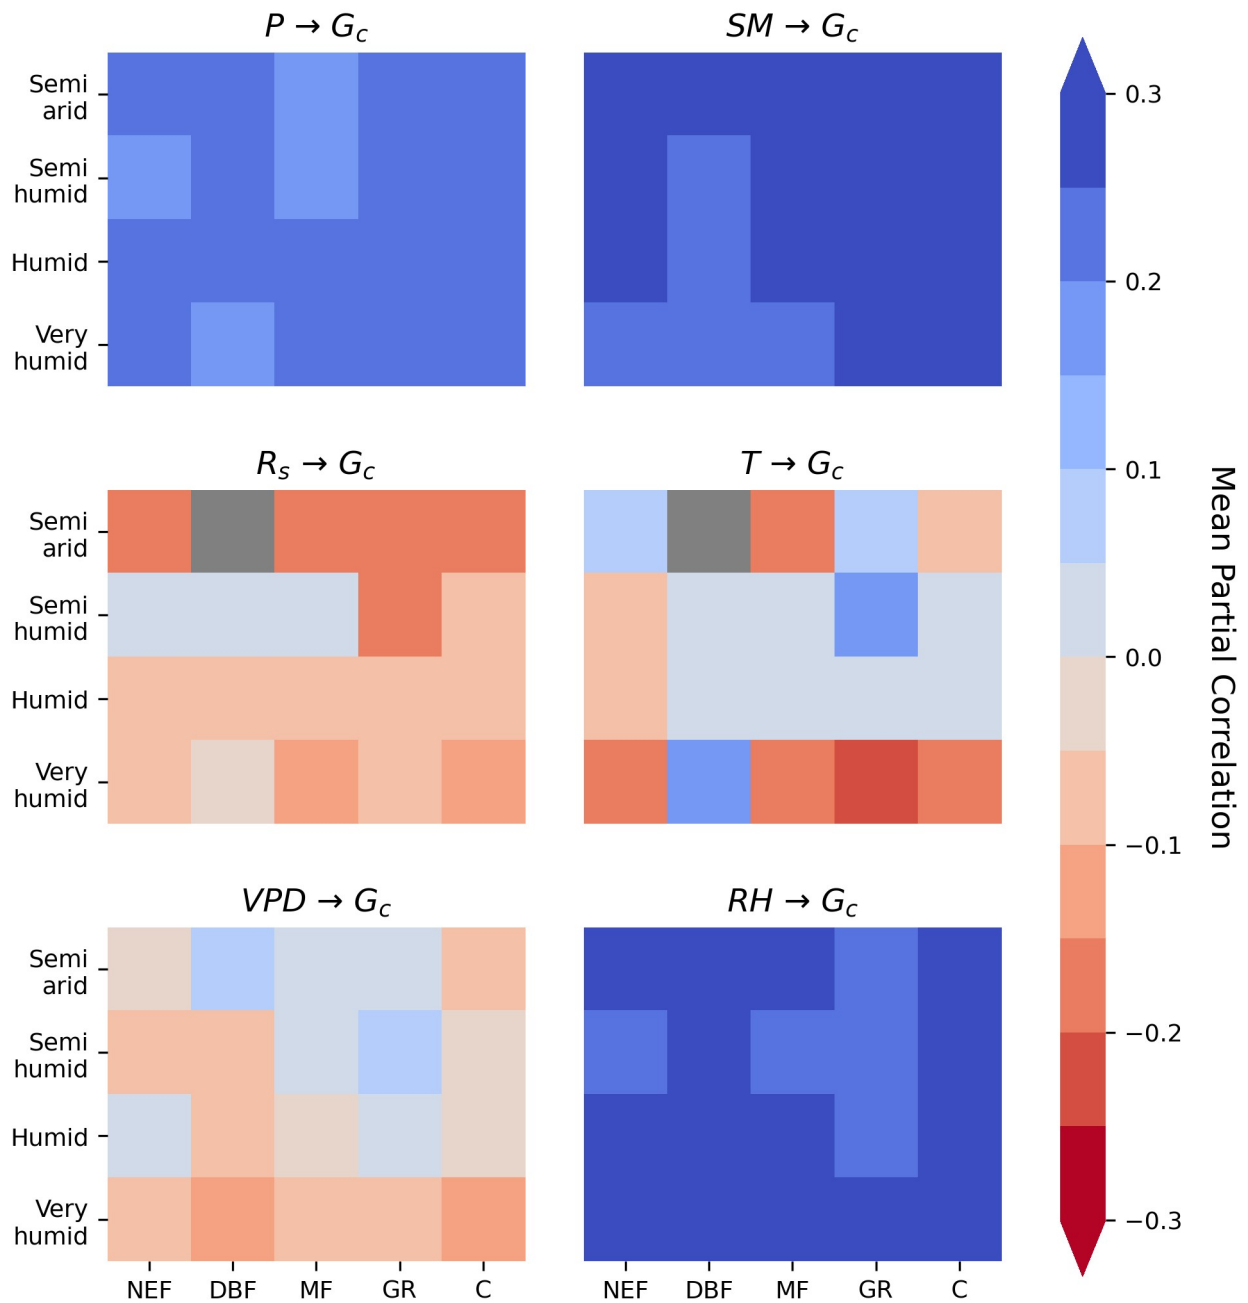

Fig. S10| Mean partial correlations (colormap) at detected directed links from the PCMCi+ analysis between hydrological (precipitation (P), soil moisture (SM)) and meteorological (shortwave incoming radiation ( $R_s$ ), temperature (T), vapour pressure deficit (VPD), relative humidity (RH)) variables to canopy conductance ( $G_c$ ) aggregated over land cover (x-axes, NEF = Needleleaf Evergreen Forest, DBF = Deciduous Broadleaf Forest, MF = Mixed Forest, GR = Grasslands, C = Croplands) and hydro-climates (y-axes).

Table S3| FLUXNET2015 site data availability information and coefficient of determination ( $R^2$ ) with the interpolated GLASS gross primary production (GPP) and evapotranspiration (ET).

| Site Code | Latitude | Longitude | Start Year | End Year | N Years | $R^2$ - GPP | $R^2$ - ET |
|-----------|----------|-----------|------------|----------|---------|-------------|------------|
| AT-Neu    | 47.12    | 11.32     | 2002       | 2012     | 11      | 0.65        | 0.73       |
| BE-Bra    | 51.3076  | 4.5198    | 1996       | 2014     | 19      | 0.7969      | 0.7498     |
| BE-Lon    | 50.5516  | 4.7462    | 2004       | 2014     | 11      | 0.4158      | 0.6768     |
| BE-Vie    | 50.3049  | 5.9981    | 1996       | 2014     | 19      | 0.8259      | 0.7544     |
| CH-Cha    | 47.2102  | 8.4104    | 2005       | 2014     | 10      | 0.5779      | 0.8279     |
| CH-Dav    | 46.8153  | 9.8559    | 1997       | 2014     | 18      | 0.6405      | 0.5675     |
| CH-Fru    | 47.1158  | 8.5378    | 2005       | 2014     | 10      | 0.7134      | 0.7406     |
| CH-Lae    | 47.4783  | 8.3644    | 2004       | 2014     | 11      | 0.725       | 0.7836     |
| CH-Oe1    | 47.2858  | 7.7319    | 2002       | 2008     | 7       | 0.5537      | 0.7991     |
| CH-Oe2    | 47.2864  | 7.7338    | 2004       | 2014     | 11      | 0.372       | 0.7057     |
| CZ-BK1    | 49.5021  | 18.5369   | 2004       | 2014     | 11      | 0.7039      | 0.6453     |
| CZ-BK2    | 49.4944  | 18.5429   | 2004       | 2012     | 9       | 0.7047      | 0.6735     |
| CZ-wet    | 49.0247  | 14.7704   | 2006       | 2014     | 9       | 0.777       | 0.8101     |
| DE-Akm    | 53.8662  | 13.6834   | 2009       | 2014     | 6       | 0.7967      | 0.833      |
| DE-Geb    | 51.0997  | 10.9146   | 2001       | 2014     | 14      | 0.5494      | 0.7468     |
| DE-Gri    | 50.95    | 13.5126   | 2004       | 2014     | 11      | 0.7394      | 0.7693     |
| DE-Hai    | 51.0792  | 10.4522   | 2000       | 2012     | 13      | 0.8139      | 0.8466     |
| DE-Kli    | 50.8931  | 13.5224   | 2004       | 2014     | 11      | 0.5183      | 0.6573     |
| DE-Lkb    | 49.0996  | 13.3047   | 2009       | 2013     | 5       | 0.5941      | 0.7711     |
| DE-Lnf    | 51.3282  | 10.3678   | 2002       | 2012     | 11      | 0.8058      | 0.8037     |
| DE-Obe    | 50.7867  | 13.7213   | 2008       | 2014     | 7       | 0.7338      | 0.7647     |
| DE-RuR    | 50.6219  | 6.3041    | 2011       | 2014     | 4       | 0.7825      | 0.8995     |
| DE-RuS    | 50.8659  | 6.4471    | 2011       | 2014     | 4       | 0.6267      | 0.8024     |
| DE-Seh    | 50.8706  | 6.4497    | 2007       | 2010     | 4       | 0.5818      | 0.7269     |
| DE-SfN    | 47.8064  | 11.3275   | 2012       | 2014     | 3       | 0.749       | 0.8758     |
| DE-Spw    | 51.8923  | 14.0337   | 2010       | 2014     | 5       | 0.8777      | 0.84       |
| DE-Tha    | 50.9626  | 13.5652   | 1996       | 2014     | 19      | 0.8457      | 0.7349     |
| DE-Zrk    | 53.8759  | 12.889    | 2013       | 2014     | 2       | 0.8265      | 0.8869     |
| DK-Eng    | 55.6905  | 12.1918   | 2005       | 2008     | 4       | 0.7097      | 0.8365     |
| DK-Sor    | 55.4859  | 11.6446   | 1996       | 2014     | 19      | 0.9202      | 0.858      |
| ES-LgS    | 37.0979  | -2.9658   | 2007       | 2009     | 3       | 0.2269      | 0.602      |
| FI-Hyy    | 61.8474  | 24.2948   | 1996       | 2014     | 19      | 0.9093      | 0.8344     |
| FI-Jok    | 60.8986  | 23.5135   | 2000       | 2003     | 4       | 0.6497      | 0.7566     |
| FI-Let    | 60.6418  | 23.9595   | 2009       | 2012     | 4       | 0.8718      | 0.8641     |
| FI-Lom    | 67.9972  | 24.2092   | 2007       | 2009     | 3       | 0.8537      | 0.7982     |
| FI-Sod    | 67.3624  | 26.6386   | 2001       | 2014     | 14      | 0.8103      | 0.8082     |
| FR-Fon    | 48.4764  | 2.7801    | 2005       | 2014     | 10      | 0.8276      | 0.8583     |
| FR-Gri    | 48.8442  | 1.9519    | 2004       | 2014     | 11      | 0.4655      | 0.6215     |
| FR-LBr    | 44.7171  | -0.7693   | 1996       | 2008     | 13      | 0.6657      | 0.662      |

|        |         |         |      |      |    |        |        |
|--------|---------|---------|------|------|----|--------|--------|
| FR-Pue | 43.7413 | 3.5957  | 2000 | 2014 | 15 | 0.3914 | 0.4659 |
| IT-BCi | 40.5238 | 14.9574 | 2004 | 2014 | 11 | 0.0259 | 0.51   |
| IT-CA1 | 42.3804 | 12.0266 | 2011 | 2014 | 4  | 0.6549 | 0.6857 |
| IT-CA2 | 42.3772 | 12.026  | 2011 | 2014 | 4  | 0.3282 | 0.3121 |
| IT-CA3 | 42.38   | 12.0222 | 2011 | 2014 | 4  | 0.4748 | 0.7485 |
| IT-Col | 41.8494 | 13.5881 | 1996 | 2014 | 19 | 0.6799 | 0.7071 |
| IT-Cp2 | 41.7043 | 12.3573 | 2012 | 2014 | 3  | 0.5305 | 0.7626 |
| IT-Cpz | 41.7053 | 12.3761 | 1997 | 2009 | 13 | 0.4681 | 0.6185 |
| IT-Isp | 45.8126 | 8.6336  | 2013 | 2014 | 2  | 0.742  | 0.8319 |
| IT-La2 | 45.9542 | 11.2853 | 2000 | 2002 | 3  | 0.7812 | 0.6949 |
| IT-Lav | 45.9562 | 11.2813 | 2003 | 2014 | 12 | 0.7602 | 0.7545 |
| IT-MBo | 46.0147 | 11.0458 | 2003 | 2013 | 11 | 0.8252 | 0.8322 |
| IT-PT1 | 45.2009 | 9.061   | 2002 | 2004 | 3  | 0.7463 | 0.8603 |
| IT-Ren | 46.5869 | 11.4337 | 1998 | 2013 | 16 | 0.7666 | 0.7354 |
| IT-Ro1 | 42.4081 | 11.93   | 2000 | 2008 | 9  | 0.5296 | 0.7576 |
| IT-Ro2 | 42.3903 | 11.9209 | 2002 | 2012 | 11 | 0.3693 | 0.7277 |
| IT-SR2 | 43.732  | 10.2909 | 2013 | 2014 | 2  | 0.7706 | 0.8171 |
| IT-SRo | 43.7279 | 10.2844 | 1999 | 2012 | 14 | 0.5607 | 0.4291 |
| IT-Tor | 45.8444 | 7.5781  | 2008 | 2014 | 7  | 0.8306 | 0.825  |
| NL-Hor | 52.2404 | 5.0713  | 2004 | 2011 | 8  | 0.8252 | 0.6789 |
| NL-Loo | 52.1666 | 5.7436  | 1996 | 2014 | 19 | 0.8552 | 0.698  |

Table S4| ICOS Drought2018 site data availability information and coefficient of determination ( $R^2$ ) with the interpolated GLASS gross primary production (GPP) and evapotranspiration (ET).

| Site Code | Latitude | Longitude | Start Year | End Year | N Years | $R^2$ - GPP | $R^2$ - ET |
|-----------|----------|-----------|------------|----------|---------|-------------|------------|
| BE-Bra    | 51.31    | 4.52      | 1996       | 2018     | 23      | 0.79        | 0.75       |
| BE-Lon    | 50.5516  | 4.7462    | 2004       | 2018     | 15      | 0.4188      | 0.6574     |
| BE-Vie    | 50.3049  | 5.9981    | 1996       | 2018     | 23      | 0.8295      | 0.7542     |
| CH-Aws    | 46.5832  | 9.7904    | 2010       | 2018     | 9       | 0.6327      | 0.4476     |
| CH-Cha    | 47.2102  | 8.4104    | 2005       | 2018     | 14      | 0.5837      | 0.8275     |
| CH-Dav    | 46.8153  | 9.8559    | 1997       | 2018     | 22      | 0.5372      | 0.6758     |
| CH-Fru    | 47.1158  | 8.5378    | 2005       | 2018     | 14      | 0.6628      | 0.7174     |
| CH-Lae    | 47.4783  | 8.3644    | 2004       | 2018     | 15      | 0.4655      | 0.7584     |
| CH-Oe2    | 47.2864  | 7.7338    | 2004       | 2018     | 15      | 0.359       | 0.6998     |
| CZ-BK1    | 49.5021  | 18.5369   | 2004       | 2018     | 15      | 0.7139      | 0.6301     |
| CZ-Lnz    | 48.6816  | 16.9464   | 2015       | 2018     | 4       | 0.8997      | 0.877      |
| CZ-RAJ    | 49.4437  | 16.6965   | 2012       | 2018     | 7       | 0.7669      | 0.7075     |
| CZ-Stn    | 49.036   | 17.9699   | 2010       | 2018     | 9       | 0.7893      | 0.8051     |
| CZ-wet    | 49.0247  | 14.7704   | 2006       | 2018     | 13      | 0.7835      | 0.8295     |
| DE-Akm    | 53.8662  | 13.6834   | 2009       | 2018     | 10      | 0.747       | 0.5106     |
| DE-Geb    | 51.0997  | 10.9146   | 2001       | 2018     | 18      | 0.5273      | 0.7345     |
| DE-Gri    | 50.95    | 13.5126   | 2004       | 2018     | 15      | 0.6702      | 0.7809     |
| DE-Hai    | 51.0792  | 10.4522   | 2000       | 2018     | 19      | 0.802       | 0.8093     |
| DE-HoH    | 52.0853  | 11.2192   | 2015       | 2018     | 4       | 0.7152      | 0.806      |
| DE-Hte    | 54.2103  | 12.1761   | 2009       | 2018     | 10      | 0.6624      | 0.821      |
| DE-Hzd    | 50.9638  | 13.4898   | 2010       | 2018     | 9       | 0.6875      | 0.7165     |
| DE-Kli    | 50.8931  | 13.5224   | 2004       | 2018     | 15      | 0.4974      | 0.6684     |
| DE-Obe    | 50.7867  | 13.7213   | 2008       | 2018     | 11      | 0.7272      | 0.6545     |
| DE-RuR    | 50.6219  | 6.3041    | 2011       | 2018     | 8       | 0.755       | 0.8054     |
| DE-RuS    | 50.8659  | 6.4471    | 2011       | 2018     | 8       | 0.4853      | 0.7272     |
| DE-RuW    | 50.5049  | 6.331     | 2010       | 2018     | 9       | 0.5919      | 0.3929     |
| DE-Tha    | 50.9626  | 13.5652   | 1996       | 2018     | 23      | 0.8262      | 0.7107     |
| DK-Sor    | 55.4859  | 11.6446   | 1996       | 2018     | 23      | 0.9105      | 0.8605     |
| ES-Abr    | 38.7018  | -6.7859   | 2015       | 2018     | 4       | 0.4522      | 0.2721     |
| ES-LM1    | 39.9427  | -5.7787   | 2014       | 2018     | 5       | 0.561       | 0.545      |
| ES-LM2    | 39.9346  | -5.7759   | 2014       | 2018     | 5       | 0.6123      | 0.5113     |
| FI-Hyy    | 61.8474  | 24.2948   | 1996       | 2018     | 23      | 0.9104      | 0.8369     |
| FI-Let    | 60.6418  | 23.9595   | 2009       | 2018     | 10      | 0.8119      | 0.7951     |
| FI-Sii    | 61.8327  | 24.1929   | 2016       | 2018     | 3       | 0.8426      | 0.7666     |
| FI-Var    | 67.7549  | 29.61     | 2016       | 2018     | 3       | 0.8327      | 0.8588     |
| FR-Bil    | 44.4937  | -0.9561   | 2014       | 2018     | 5       | 0.5664      | 0.6605     |
| FR-EM2    | 49.8721  | 3.0207    | 2017       | 2018     | 2       | 0.53        | 0.773      |
| FR-Hes    | 48.6741  | 7.0647    | 2014       | 2018     | 5       | 0.8491      | 0.7584     |
| IT-BCi    | 40.5238  | 14.9574   | 2004       | 2018     | 15      | 0.0172      | 0.4715     |

|        |         |         |      |      |    |        |        |
|--------|---------|---------|------|------|----|--------|--------|
| IT-Cp2 | 41.7043 | 12.3573 | 2012 | 2018 | 7  | 0.5443 | 0.5834 |
| IT-Lsn | 45.7405 | 12.7503 | 2016 | 2018 | 3  | 0.7726 | 0.8336 |
| IT-SR2 | 43.732  | 10.2909 | 2013 | 2018 | 6  | 0.7066 | 0.8293 |
| IT-Tor | 45.8444 | 7.5781  | 2008 | 2018 | 11 | 0.8221 | 0.7769 |
| NL-Loo | 52.1666 | 5.7436  | 1996 | 2018 | 23 | 0.8503 | 0.6938 |
| RU-Fy2 | 56.4476 | 32.9019 | 2015 | 2018 | 4  | 0.849  | 0.7957 |
| RU-Fyo | 56.4615 | 32.9221 | 1998 | 2018 | 21 | 0.8575 | 0.7646 |
| SE-Deg | 64.182  | 19.5565 | 2001 | 2018 | 18 | 0.8362 | 0.7623 |
| SE-Htm | 56.0976 | 13.419  | 2015 | 2018 | 4  | 0.8045 | 0.77   |
| SE-Lnn | 58.3406 | 13.1018 | 2014 | 2018 | 5  | 0.6429 | 0.6703 |
| SE-Nor | 60.0865 | 17.4795 | 2014 | 2018 | 5  | 0.8721 | 0.8426 |
| SE-Ros | 64.1725 | 19.738  | 2014 | 2018 | 5  | 0.8834 | 0.7261 |
| SE-Svb | 64.2561 | 19.7745 | 2014 | 2018 | 5  | 0.8847 | 0.5192 |

Table S5| SAPFLUXNET sites used in this study and further information as well as  $R^2$  s of transpiration upscaled from sap flux with correspondent data from interpolated GLEAM and ERA5-Land.

| Site Code       | Latitude | Longitude | Start Year | End Year | N Years | $R^2$ -GLEAM | $R^2$ - ERA5L |
|-----------------|----------|-----------|------------|----------|---------|--------------|---------------|
| CZE_BIK         | 49.49    | 18.53     | 2015       | 2016     | 1       | 0.31         | 0.3           |
| CZE_BIL_BIL     | 49.25    | 16.69     | 2014       | 2017     | 3       | 0.38         | 0.37          |
| CZE_KRT_KRT     | 49.32    | 16.75     | 2013       | 2017     | 4       | 0.55         | 0.57          |
| CZE_LIZ_LES     | 49.07    | 13.68     | 2007       | 2009     | 2       | 0.63         | 0.57          |
| CZE_SOB_SOB     | 49.25    | 16.69     | 2013       | 2017     | 4       | 0.3          | 0.33          |
| CZE_UTE_BEE     | 49.28    | 16.65     | 2013       | 2017     | 4       | 0.59         | 0.58          |
| CZE_UTE_BNA     | 49.28    | 16.65     | 2013       | 2017     | 4       | 0.58         | 0.56          |
| CZE_UTE_BPO     | 49.28    | 16.65     | 2013       | 2017     | 4       | 0.53         | 0.48          |
| CZE_UTE_SPR     | 49.28    | 16.65     | 2013       | 2017     | 4       | 0.43         | 0.27          |
| DEU_MER_BEE_NON | 49.27    | 7.81      | 2009       | 2012     | 3       | 0.28         | 0.21          |
| DEU_MER_BEE_THI | 49.27    | 7.81      | 2012       | 2015     | 3       | 0.53         | 0.52          |
| DEU_MER_DOU_NON | 49.27    | 7.81      | 2009       | 2012     | 3       | 0.42         | 0.37          |
| DEU_MER_DOU_THI | 49.27    | 7.81      | 2012       | 2015     | 3       | 0.57         | 0.59          |
| DEU_MER_MIX_NON | 49.27    | 7.81      | 2009       | 2012     | 3       | 0.53         | 0.37          |
| DEU_MER_MIX_THI | 49.27    | 7.81      | 2012       | 2015     | 3       | 0.62         | 0.62          |
| ESP_ALT_ARM     | 40.78    | -2.33     | 2009       | 2014     | 5       | 0.56         | 0.51          |
| ESP_ALT_HUE     | 40.79    | -2.29     | 2009       | 2013     | 4       | 0.45         | 0.35          |
| ESP_ALT_TRI     | 40.8     | -2.23     | 2008       | 2015     | 7       | 0.27         | 0.21          |
| ESP_CAN         | 41.43    | 2.07      | 2011       | 2012     | 1       | 0.47         | 0.45          |
| ESP_GUA_VAL     | 40.9     | -4.03     | 2011       | 2013     | 2       | 0.02         | 0.21          |
| ESP_LAH_COM     | 37.74    | -3.38     | 2011       | 2013     | 2       | 0.11         | 0.46          |
| ESP_LAS         | 28.31    | -16.57    | 2008       | 2009     | 1       | 0.14         | 0.02          |
| ESP_MAJ_MAI     | 39.94    | -5.77     | 2015       | 2018     | 3       | 0.49         | 0.43          |
| ESP_MAJ_NOR_LM1 | 39.94    | -5.77     | 2015       | 2018     | 3       | 0.56         | 0.57          |
| ESP_MON_SIE_NAT | 41.12    | -3.5      | 2010       | 2014     | 4       | 0.4          | 0.49          |
| ESP_ROM_PIL     | 36.69    | -5.02     | 2011       | 2013     | 2       | 0            | 0.25          |
| ESP_TIL_MIX     | 41.33    | 1.01      | 2010       | 2013     | 3       | 0.51         | 0.28          |
| ESP_TIL_OAK     | 41.33    | 1.01      | 2010       | 2011     | 1       | 0.48         | 0.24          |
| ESP_TIL_PIN     | 41.33    | 1.01      | 2010       | 2011     | 1       | 0.4          | 0.11          |
| ESP_VAL_BAR     | 42.2     | 1.82      | 2003       | 2005     | 2       | 0.31         | 0.24          |
| ESP_VAL_SOR     | 42.2     | 1.81      | 2003       | 2005     | 2       | 0.51         | 0.49          |
| ESP_YUN_C1      | 36.72    | -4.97     | 2009       | 2014     | 5       | 0.26         | 0.26          |
| ESP_YUN_C2      | 36.72    | -4.97     | 2011       | 2014     | 3       | 0.52         | 0.63          |
| ESP_YUN_T1_THI  | 36.72    | -4.97     | 2010       | 2014     | 4       | 0.42         | 0.47          |
| ESP_YUN_T3_THI  | 36.72    | -4.97     | 2009       | 2014     | 5       | 0.33         | 0.4           |
| FRA_FON         | 48.48    | 2.78      | 2005       | 2014     | 9       | 0.45         | 0.37          |
| FRA_HES_HE1_NON | 48.67    | 7.06      | 1997       | 1999     | 2       | 0.35         | 0.32          |
| FRA_HES_HE2_NON | 48.67    | 7.06      | 2000       | 2006     | 6       | 0.34         | 0.3           |
| FRA_PUE         | 43.74    | 3.6       | 1999       | 2015     | 16      | 0.56         | 0.5           |

|                 |       |       |      |      |   |      |      |
|-----------------|-------|-------|------|------|---|------|------|
| ISR_YAT_YAT     | 31.35 | 35.05 | 2009 | 2015 | 6 | 0.32 | 0.21 |
| ITA_TOR         | 45.82 | 7.56  | 2015 | 2016 | 1 | 0.38 | 0.52 |
| NLD_LOO         | 52.17 | 5.74  | 2011 | 2015 | 4 | 0.58 | 0.48 |
| RUS_FYO         | 56.46 | 32.92 | 1998 | 2004 | 6 | 0.27 | 0.22 |
| SWE_NOR_ST1_AF1 | 60.09 | 17.48 | 2009 | 2010 | 1 | 0.31 | 0.41 |
| SWE_NOR_ST1_AF2 | 60.09 | 17.48 | 2009 | 2010 | 1 | 0.6  | 0.58 |
| SWE_NOR_ST1_BEF | 60.09 | 17.48 | 2007 | 2009 | 2 | 0.01 | 0.03 |
| SWE_NOR_ST2     | 60.09 | 17.48 | 2001 | 2002 | 1 | 0.35 | 0.26 |
| SWE_NOR_ST3     | 60.09 | 17.48 | 2002 | 2008 | 6 | 0.36 | 0.28 |
| SWE_NOR_ST4_AFT | 60.08 | 17.48 | 1999 | 2001 | 2 | 0.57 | 0.52 |
| SWE_NOR_ST5_REF | 60.08 | 17.48 | 1998 | 2001 | 3 | 0.47 | 0.44 |
| SWE_SKO_MIN     | 58.36 | 12.15 | 2014 | 2015 | 1 | 0.53 | 0.43 |
| SWE_SKY_38Y     | 60.13 | 17.84 | 2001 | 2003 | 2 | 0.46 | 0.31 |
| SWE_SKY_68Y     | 60.1  | 17.83 | 2001 | 2003 | 2 | 0.65 | 0.54 |
| SWE_SVA_MIX_NON | 64.26 | 19.77 | 2016 | 2017 | 1 | 0.71 | 0.66 |

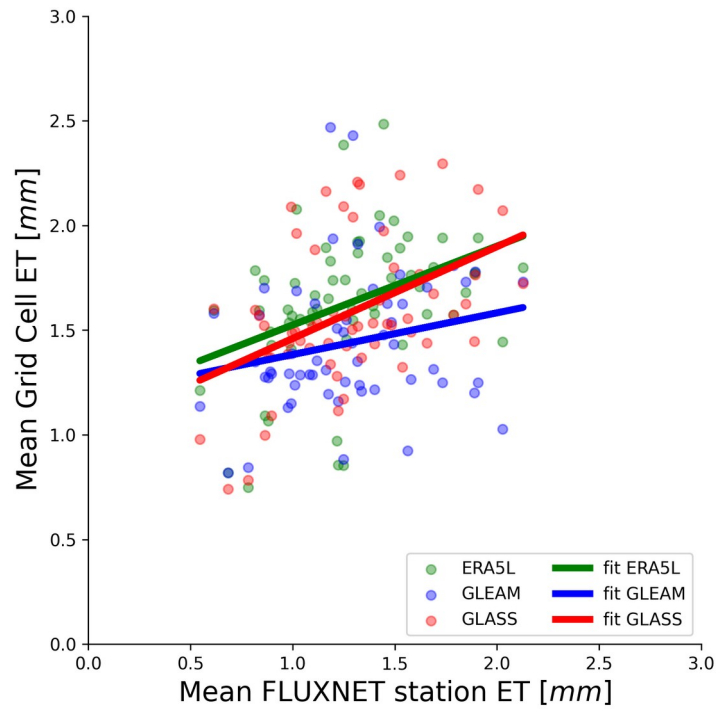

Fig. S11| Comparison of mean evapotranspiration (ET) values from FLUXNET2015 stations in the domain (see Table S3) and the mean of the corresponding grid cell of ERA5-Land (ERA5L, green markers), GLEAM (blue markers), and GLASS (red markers) ET. The solid lines correspond to a linear regression fit with a least squares method.

347

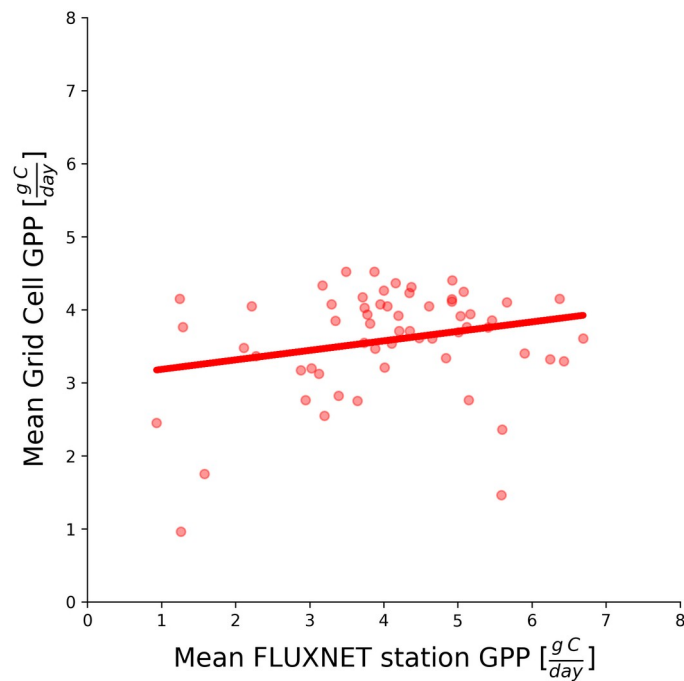

Fig. S12| Comparison of mean gross primary production (GPP) values from FLUXNET2015 stations in the domain (see Table S3) and the mean of the corresponding grid cell GLASS GPP. The solid line corresponds to a linear regression with least squares method.
